# Supplementary material for: The Effect of Omega-9 on Bone Viscoelasticity and Strength in an Ovariectomized Diet-Fed Murine Model
Source: MDPI journal article supplement (doi:10.3390/nu15051209), 2023-02-28
Supplement: s1 [file s1]

### Supplementary Figures

| Study Week | Control BW (mean $\pm$ SE) | OVX BW (mean $\pm$ SE) | OVX + E <sub>2</sub> BW (mean $\pm$ SE) |
|------------|----------------------------|------------------------|-----------------------------------------|
|            |                            |                        |                                         |
| 1          | 18.92 $\pm$ 0.32           | 25.41 $\pm$ 0.49       | 20.96 $\pm$ 0.23                        |
| 2          | 19.60 $\pm$ 0.26           | 28.42 $\pm$ 0.73       | 21.49 $\pm$ 0.21                        |
| 3          | 20.44 $\pm$ 0.27           | 31.30 $\pm$ 0.96       | 22.44 $\pm$ 0.26                        |
| 4          | 21.26 $\pm$ 0.37           | 33.69 $\pm$ 0.90       | 22.87 $\pm$ 0.26                        |
| 5          | 21.68 $\pm$ 0.19           | 33.23 $\pm$ 1.22       | 23.78 $\pm$ 0.20                        |
| 6          | 22.47 $\pm$ 0.41           | 34.75 $\pm$ 1.22       | 23.76 $\pm$ 0.24                        |
| 7          | 23.10 $\pm$ 0.43           | 37.04 $\pm$ 1.05       | 23.84 $\pm$ 0.22                        |
| 8          | 24.14 $\pm$ 0.53           | 39.25 $\pm$ 1.13       | 24.26 $\pm$ 0.23                        |
| 9          | 25.26 $\pm$ 0.65           | 41.23 $\pm$ 1.02       | 25.29 $\pm$ 0.28                        |
| 10         | 25.77 $\pm$ 0.90           | 42.09 $\pm$ 1.09       | 25.51 $\pm$ 0.35                        |
| 11         | 26.89 $\pm$ 0.98           | 44.05 $\pm$ 0.91       | 26.25 $\pm$ 0.35                        |
| 12         | 28.05 $\pm$ 1.11           | 45.90 $\pm$ 1.14       | 27.32 $\pm$ 0.35                        |

**Supplementary Table S1:** Mean values  $\pm$  standard error of body weight (g) measured in each of the groups and over the 12-week study period.

| Study Week | Control WG (mean $\pm$ SE) | OVX WG (mean $\pm$ SE) | OVX + E <sub>2</sub> WG (mean $\pm$ SE) |
|------------|----------------------------|------------------------|-----------------------------------------|
|            |                            |                        |                                         |
| 1          | 0.00                       | 0.00                   | 0.00                                    |
| 2          | 0.68 $\pm$ 0.25            | 3.01 $\pm$ 0.34        | 0.53 $\pm$ 0.15                         |
| 3          | 0.84 $\pm$ 0.15            | 2.88 $\pm$ 0.44        | 0.96 $\pm$ 0.13                         |
| 4          | 0.81 $\pm$ 0.15            | 2.38 $\pm$ 0.22        | 0.43 $\pm$ 0.11                         |
| 5          | 0.42 $\pm$ 0.25            | -0.47 $\pm$ 0.34       | 0.91 $\pm$ 0.13                         |
| 6          | 0.79 $\pm$ 0.28            | 1.53 $\pm$ 0.35        | -0.02 $\pm$ 0.14                        |
| 7          | 0.63 $\pm$ 0.19            | 2.29 $\pm$ 0.23        | 0.08 $\pm$ 0.12                         |
| 8          | 1.05 $\pm$ 0.19            | 2.20 $\pm$ 0.19        | 0.42 $\pm$ 0.12                         |
| 9          | 1.12 $\pm$ 0.37            | 1.99 $\pm$ 0.31        | 1.02 $\pm$ 0.14                         |
| 10         | 0.51 $\pm$ 0.30            | 0.86 $\pm$ 1.18        | 0.22 $\pm$ 0.19                         |
| 11         | 1.12 $\pm$ 0.17            | 1.95 $\pm$ 0.36        | 0.74 $\pm$ 0.14                         |
| 12         | 1.30 $\pm$ 0.45            | 2.18 $\pm$ 0.59        | 1.07 $\pm$ 0.20                         |

**Supplementary Table S2:** Mean values  $\pm$  standard error of body weight gain (g) measured in each of the groups and over the 12-week study period.

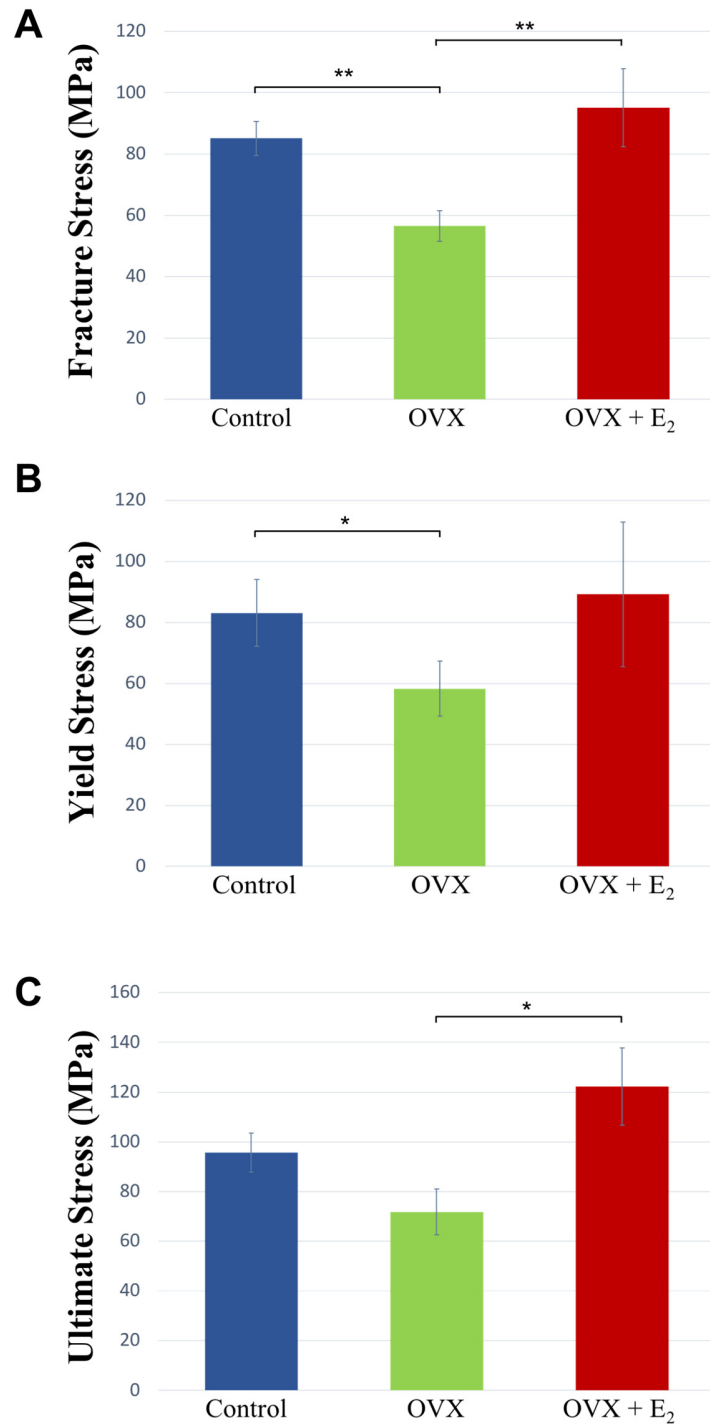

**Supplementary Figure S1.** The mechanical properties of [A] fracture strength  $\sigma_f$ , [B] yield stress  $\sigma_y$ , [C] ultimate stress  $\sigma_u$ , and [D] elastic modulus  $E$ , at the tibial mid-point in the control, OVX, and OVX + E<sub>2</sub> groups ( $n = 6$ ) \* $p < 0.05$ , \*\* $p < 0.01$

| <i>Variables</i>                                       | <i>Control</i> | <i>OVX</i>     | <i>OVX + E<sub>2</sub></i> |
|--------------------------------------------------------|----------------|----------------|----------------------------|
| <i>Yield stress<br/><math>\sigma_y</math> (MPa)</i>    | 125.27 ± 18.73 | 124.79 ± 18.72 | 123.44 ± 29.69             |
| <i>Ultimate stress<br/><math>\sigma_u</math> (MPa)</i> | 143.94 ± 15.27 | 154.53 ± 19.55 | 170.06 ± 19.45             |
| <i>Fracture stress<br/><math>\sigma_f</math> (MPa)</i> | 127.60 ± 10.66 | 121.63 ± 10.04 | 130.76 ± 29.42             |
| <i>Elastic modulus E<br/>(GPa)</i>                     | 2.91 ± 1.12    | 3.84 ± 0.79    | 2.85 ± 0.55                |

**Supplementary Table S3:** The biomechanical strength properties at the tibial midpoint in each of the groups. Values are normalized according to body weight and tibial length

| <i>Variables</i>                                       | <i>Control</i> | <i>OVX</i>   | <i>OVX + E<sub>2</sub></i> |
|--------------------------------------------------------|----------------|--------------|----------------------------|
| <i>Yield stress<br/><math>\sigma_y</math> (MPa)</i>    | 83.11 ± 10.88  | 58.21 ± 9.06 | 89.17 ± 23.67              |
| <i>Ultimate stress<br/><math>\sigma_u</math> (MPa)</i> | 95.69 ± 7.89   | 71.73 ± 9.24 | 122.32 ± 15.54             |
| <i>Fracture stress<br/><math>\sigma_f</math> (MPa)</i> | 85.09 ± 5.57   | 56.49 ± 4.91 | 95.05 ± 12.68              |
| <i>Elastic modulus E<br/>(GPa)</i>                     | 1.92 ± 0.29    | 1.77 ± 0.36  | 2.06 ± 0.45                |

**Supplementary Table S4:** The biomechanical strength properties at the tibial midpoint in each of the groups. Values are [non-normalized] according to body weight and tibial length

|                      | Control | OVX   | OVX + E <sub>2</sub> |
|----------------------|---------|-------|----------------------|
| Control              |         |       |                      |
| OVX                  | 0.754   |       |                      |
| OVX + E <sub>2</sub> | 0.917   | 0.754 |                      |

**Supplementary Table S5:** [Unadjusted data]. *p* values obtained following the comparison of yield stress (MPa) in each of the groups.

|                      | Control | OVX   | OVX + E <sub>2</sub> |
|----------------------|---------|-------|----------------------|
| Control              |         |       |                      |
| OVX                  | 0.602   |       |                      |
| OVX + E <sub>2</sub> | 0.251   | 0.602 |                      |

**Supplementary Table S6:** [Unadjusted data]. *p* values obtained following the comparison of ultimate stress (MPa) in each of the groups.

|                      | Control | OVX   | OVX + E <sub>2</sub> |
|----------------------|---------|-------|----------------------|
| Control              |         |       |                      |
| OVX                  | 0.754   |       |                      |
| OVX + E <sub>2</sub> | 0.917   | 0.465 |                      |

**Supplementary Table S7:** [Unadjusted data]. *p* values obtained following the comparison of fracture stress (MPa) in each of the groups.

|                      | Control | OVX   | OVX + E <sub>2</sub> |
|----------------------|---------|-------|----------------------|
| Control              |         |       |                      |
| OVX                  | 0.251   |       |                      |
| OVX + E <sub>2</sub> | 0.917   | 0.251 |                      |

**Supplementary Table S8:** [Unadjusted data]. *p* values obtained following the comparison of elastic modulus (GPa) in each of the groups.

|                      | Control | OVX | OVX + E <sub>2</sub> |
|----------------------|---------|-----|----------------------|
| Control              |         |     |                      |
| OVX                  |         |     |                      |
| OVX + E <sub>2</sub> |         |     |                      |

**Supplementary Table S9:** [Unadjusted data]. *p* values obtained following the comparison of moment of inertia in each of the groups. \*denotes a significant difference

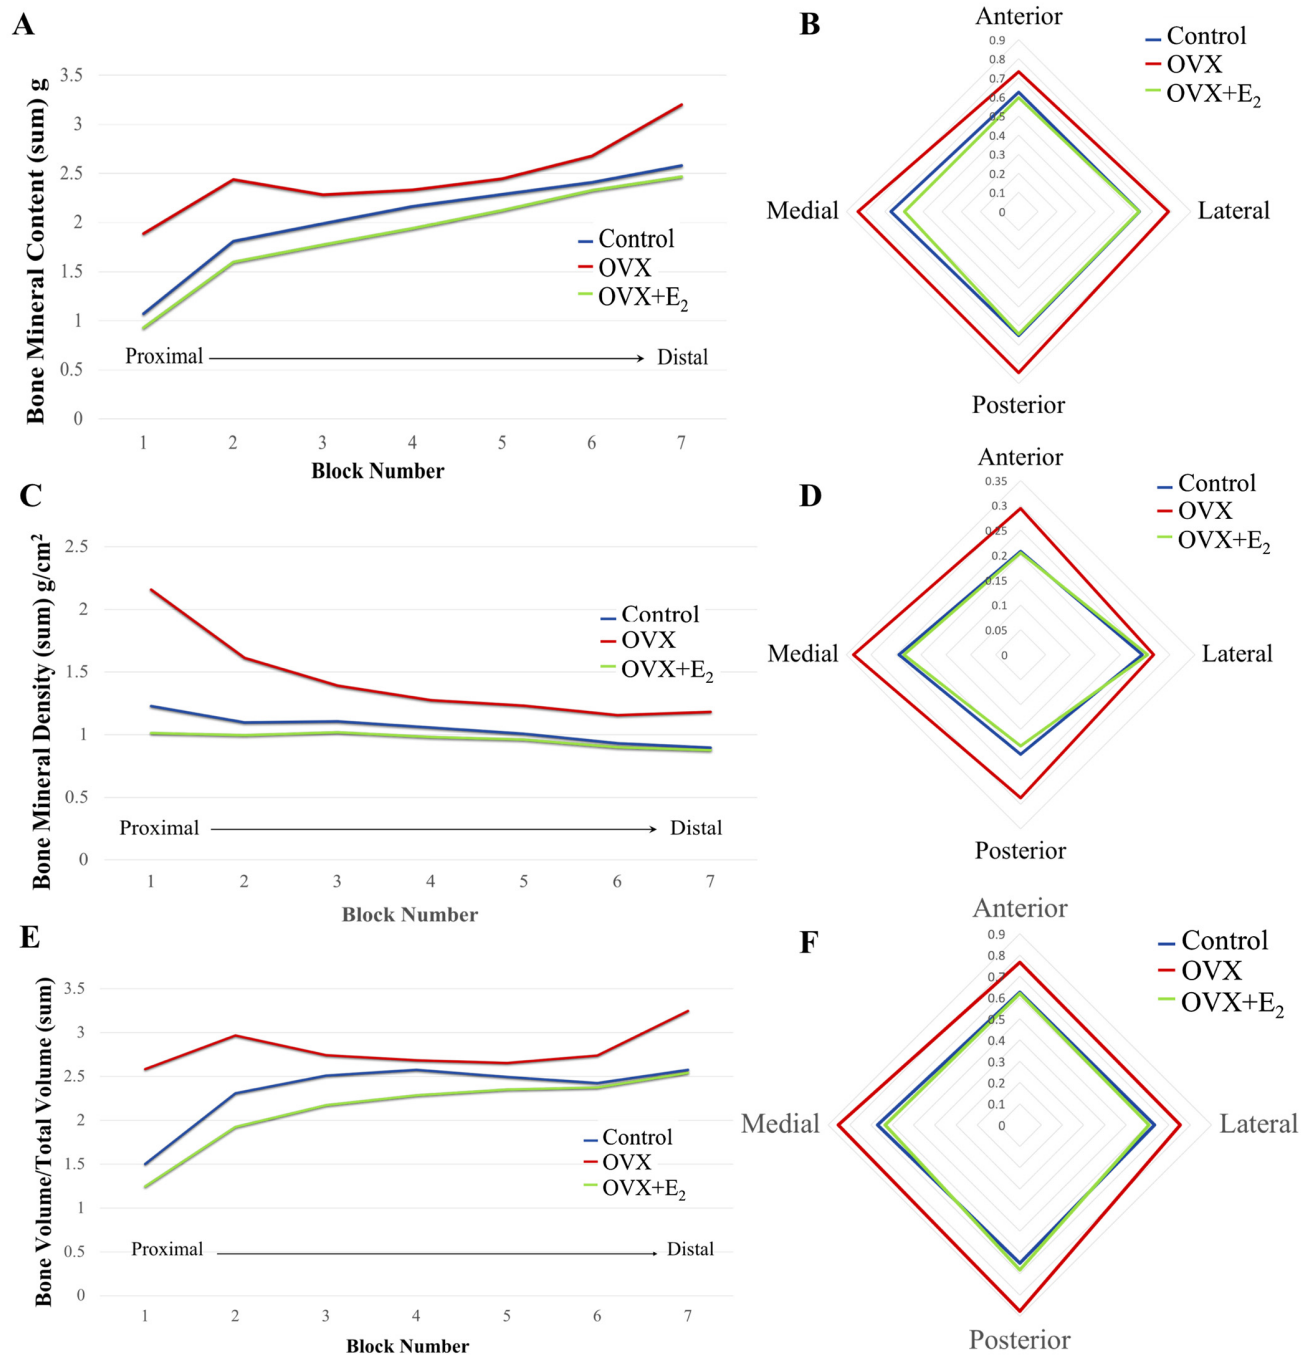

**Supplementary Figure S2.** [A] Bone mineral content (BMC) from the proximal (block 1) to the distal (block 7) region of the tibia in each of the experimental groups. [B] A comparison of BMC in the anterior, posterior, medial, and lateral aspects of the tibia. Similar results are presented for [C,D] BMD, and [E,F] BV/TV ( $n=1$ ).

| <i>Variable</i>                 | <i>Control</i> | <i>OVX</i> | <i>OVX + E<sub>2</sub></i> |
|---------------------------------|----------------|------------|----------------------------|
| <i>Total BMC (g) whole bone</i> | 7.327          | 6.749      | 10.010                     |
| <i>Total BMC by block</i>       |                |            |                            |
| <i>1 (proximal)</i>             | 1.228          | 1.014      | 2.159                      |
| <i>2</i>                        | 1.098          | 0.997      | 1.614                      |
| <i>3</i>                        | 1.108          | 1.020      | 1.392                      |
| <i>4</i>                        | 1.058          | 0.981      | 1.275                      |
| <i>5</i>                        | 1.007          | 0.969      | 1.232                      |
| <i>6</i>                        | 0.931          | 0.901      | 1.156                      |
| <i>7 (distal)</i>               | 0.896          | 0.877      | 1.184                      |

**Supplementary Table S10.** Mean values of BMC (g) in whole bone and per block in each of the groups.

| <i>Variable</i>                          | <i>Control</i> | <i>OVX</i> | <i>OVX + E<sub>2</sub></i> |
|------------------------------------------|----------------|------------|----------------------------|
| <i>BMD (g.cm<sup>3</sup>) whole bone</i> | 0.461          | 0.422      | 0.585                      |
| <i>BMD by block</i>                      |                |            |                            |
| <i>1</i>                                 | 0.267          | 0.232      | 0.472                      |
| <i>2</i>                                 | 0.452          | 0.399      | 0.609                      |
| <i>3</i>                                 | 0.497          | 0.443      | 0.570                      |
| <i>4</i>                                 | 0.542          | 0.485      | 0.583                      |
| <i>5</i>                                 | 0.572          | 0.531      | 0.611                      |
| <i>6</i>                                 | 0.603          | 0.582      | 0.670                      |
| <i>7</i>                                 | 0.645          | 0.617      | 0.780                      |

**Supplementary Table S11.** Mean values of BMD (g.cm<sup>3</sup>) in whole bone and per block in each of the groups.

| <i>Variable</i>         | <i>Control</i> | <i>OVX</i> | <i>OVX + E<sub>2</sub></i> |
|-------------------------|----------------|------------|----------------------------|
| <i>BV/TV whole bone</i> | 0.547          | 0.490      | 0.689                      |
| <i>BV/TV by block</i>   |                |            |                            |
| <i>1</i>                | 0.375          | 0.311      | 0.646                      |
| <i>2</i>                | 0.577          | 0.481      | 0.742                      |
| <i>3</i>                | 0.627          | 0.543      | 0.685                      |
| <i>4</i>                | 0.644          | 0.571      | 0.671                      |
| <i>5</i>                | 0.624          | 0.587      | 0.663                      |
| <i>6</i>                | 0.606          | 0.593      | 0.685                      |
| <i>7</i>                | 0.644          | 0.635      | 0.812                      |

**Supplementary Table S12.** Mean values of BV/TV in whole bone and per block in each of the groups.

| <i>Variables</i>                                  | <i>Control</i> | <i>OVX</i> | <i>OVX + E<sub>2</sub></i> |
|---------------------------------------------------|----------------|------------|----------------------------|
| <i>AP-ML tibia bone mineral and volume levels</i> |                |            |                            |
| <i>BMD (g.cm<sup>3</sup>):</i>                    |                |            |                            |
| <i>Anterior</i>                                   | 0.486          | 0.427      | 0.588                      |
| <i>Lateral</i>                                    | 0.505          | 0.465      | 0.625                      |
| <i>Medio</i>                                      | 0.405          | 0.394      | 0.561                      |
| <i>Posterior</i>                                  | 0.438          | 0.399      | 0.564                      |
| <i>BMC (g):</i>                                   |                |            |                            |
| <i>Anterior</i>                                   | 1.994          | 1.931      | 2.819                      |
| <i>Lateral</i>                                    | 2.079          | 1.776      | 2.582                      |
| <i>Medio</i>                                      | 1.373          | 1.222      | 1.987                      |
| <i>Posterior</i>                                  | 1.880          | 1.821      | 2.622                      |
| <i>BV/TV:</i>                                     |                |            |                            |
| <i>Anterior</i>                                   | 0.613          | 0.532      | 0.724                      |
| <i>Lateral</i>                                    | 0.576          | 0.507      | 0.711                      |
| <i>Medio</i>                                      | 0.480          | 0.468      | 0.659                      |
| <i>Posterior</i>                                  | 0.508          | 0.449      | 0.656                      |

**Supplementary Table S13:** Tibial bone mineral and volume levels in the antero-posterior and medio-lateral aspects. Data obtained from 1 animal per group.
